# Supplementary material for: Integrated analysis of gut microbiome and its metabolites in ACE2-knockout and ACE2-overexpressed mice
Source: Front Cell Infect Microbiol. 2024 Jul 17;14:1404678. doi: 10.3389/fcimb.2024.1404678 (PMC11288824; doi:10.3389/fcimb.2024.1404678)
Supplement: Additional File 1 — Information on regulated differentially fecal metabolites between the ACE2 KO and WT mice based on metabolomic profile. [file DataSheet_1.xlsx]

## Sheet: volcano
ID	FC	log2(FC)	raw.pval	vip	compound_name	Up.Down	class	KEGG_pathway_descriptionn
M1099	4.2786	2.0971	0.00059455	2.4408	Erlotinib	up	Diazanaphthalenes二氮杂萘类	-
M1106	0.24428	-2.0334	0.0007479	2.4179	Bn-NCC-2	down	Tetrapyrroles and derivatives四吡咯及其衍生物	-
M988	0.19223	-2.3791	0.00097321	2.3901	2-Undecyl-4(1H)-quinolinone	down	Quinolines and derivatives喹啉及其衍生物	-
M1367	2.9346	1.5531	0.0014959	2.341	5-Aminovaleric acid betaine	up	0	0
M949	5.5877	2.4822	0.0018334	2.316	O-Desmethylnaproxen	up	Naphthalenes萘类	-
M225	0.44317	-1.1741	0.0019164	2.3104	Gibberellin A110	down	Prenol lipids Prenol脂质	-
M952	0.39172	-1.3521	0.0022166	2.2916	Inosinic acid	down	Purine nucleotides嘌呤核苷酸	Purine metabolism;Biosynthesis of plant secondary metabolites;Biosynthesis of alkaloids derived from histidine and purine;Biosynthesis of plant hormones;Metabolic pathways;Biosynthesis of secondary metabolites;Biosynthesis of cofactors;Antifolate resistance;Taste transduction
M834	3.188	1.6726	0.0024008	2.281	Creatine riboside	up	Organooxygen compounds有机氧化合物	-
M918	0.31478	-1.6676	0.0026304	2.2686	Licarin C	down	2-arylbenzofuran flavonoids2-芳基苯并呋喃黄酮类化合物	-
M852	0.46966	-1.0903	0.002994	2.2506	Cefonicid	down	Lactams拉坦	-
M65	6.8633	2.7789	0.003227	2.2399	Mevalonic Acid Lactone	up	Lactones内酯	-
M1010	0.28701	-1.8008	0.0032736	2.2379	L-Citronellol glucosideL	down	Prenol lipids	-
M1111	0.6072	-0.71975	0.0035048	2.2279	Propyl propane thiosulfonate	down	Carboxylic acids and derivatives羧酸及其衍生物	-
M759	0.22957	-2.123	0.0040441	2.2066	Benzo[a]pyrene-9,10-oxide	down	Pyrenes	Metabolism of xenobiotics by cytochrome P450;Chemical carcinogenesis
M36	2.1838	1.1269	0.0066055	2.1274	THYMINE	up	Diazines二氮杂苯	Pyrimidine metabolism;Metabolic pathways
M338	11.345	3.504	0.0074677	2.106	4-Acetamidobutyric acid	up	Carboxylic acids and derivatives	Arginine and proline metabolism;Metabolic pathways
M50	3.3535	1.7456	0.0083051	2.087	Adenine	up	Imidazopyrimidines咪唑并嘧啶类	Purine metabolism;Zeatin biosynthesis;Metabolic pathways
M3	3.1952	1.6759	0.008742	2.0777	Pyrrolidine	up	Pyrrolidines吡咯啶	-
M739	3.4156	1.7721	0.0089291	2.0738	Deoxyadenosine	up	Purine nucleosides嘌呤核苷	Purine metabolism;Metabolic pathways;ABC transporters
M1176	0.53874	-0.89234	0.0093366	2.0655	Leukotriene B4	down	Fatty Acyls	Arachidonic acid metabolism;Metabolic pathways;PPAR signaling pathway;Neuroactive ligand-receptor interaction;Serotonergic synapse;Inflammatory mediator regulation of TRP channels;Bile secretion;Eicosanoids
M866	4.0523	2.0187	0.0096167	2.0599	Glutamylproline	up	Carboxylic acids and derivatives	-
M1270	0.55193	-0.85743	0.0096498	2.0593	Ciclesonide	down	Steroids and steroid derivatives	-
M428	1.612	0.68886	0.0096708	2.0589	LAUROYLCARNITINE	up	Fatty Acyls	-
M845	0.29799	-1.7467	0.0099764	2.053	Cascarillin	down	Prenol lipids	-
M1133	0.39532	-1.3389	0.010452	2.0441	2-Polyprenyl-3-methyl-5-hydroxy-6-methoxy-1,4-benzoquinone	down	Prenol lipids	-
M1267	0.36327	-1.4609	0.011534	2.0249	6-{5-[2,3-dioxo-3-(2,4,6-trihydroxy-3-methoxyphenyl)propyl]-2-hydroxy-3-methoxyphenoxy}-3,4,5-trihydroxyoxane-2-carboxylic acid	down	Flavonoids黄酮类化合物	-
M1126	0.47715	-1.0675	0.012751	2.0048	Lucidone A	down	Prenol lipids	-
M716	8.8634	3.1479	0.012786	2.0043	L-AcetylcarnitineL	up	Fatty Acyls	Insulin resistance
M1003	0.4385	-1.1893	0.01347	1.9936	2-Aminomuconic acid semialdehyde	down	Carboxylic acids and derivatives	Tryptophan metabolism;Aminobenzoate degradation;Metabolic pathways;Microbial metabolism in diverse environments
M149	0.35886	-1.4785	0.014318	1.981	Curdione	down	Prenol lipids	-
M415	0.30579	-1.7094	0.014401	1.9798	Enterolactone	down	Furanoid lignans呋喃木脂素	-
M55	3.2077	1.6815	0.01519	1.9686	1-Methylnicotinamide	up	Pyridines and derivatives吡啶类及其衍生物	Nicotinate and nicotinamide metabolism;Metabolic pathways;Bile secretion
M1080	0.35905	-1.4778	0.015242	1.9678	Cortisol	down	Steroids and steroid derivatives类固醇和类固醇衍生物	Steroid hormone biosynthesis;Metabolic pathways;Neuroactive ligand-receptor interaction;Cortisol synthesis and secretion;Cushing syndrome;Aldosterone-regulated sodium reabsorption;Bile secretion;Pathways in cancer;Prostate cancer;Glucocorticoid and mineralocorticoid receptor agonists/antagonists
M1184	2.5735	1.3637	0.015412	1.9655	Alprenolol	up	Phenol ethers酚醚类	-
M1191	0.35034	-1.5132	0.015467	1.9647	Pentasine	down	Carboxylic acids and derivatives	-
M421	0.38188	-1.3888	0.020014	1.9079	Myricetin	down	Flavonoids黄酮类化合物	Flavonoid biosynthesis;Flavone and flavonol biosynthesis;Biosynthesis of secondary metabolites
M841	0.65766	-0.60458	0.020652	1.9007	Chrysoobtusin	down	Anthracenes蒽	-
M821	0.39764	-1.3305	0.020728	1.8999	1,11-Undecanedicarboxylic acid	down	Fatty Acyls	-
M1248	2.3392	1.226	0.021572	1.8906	Celastrol	up	Prenol lipids	-
M511	0.20775	-2.2671	0.022091	1.8851	Ceanothine B	down	Carboxylic acids and derivatives	-
M1385	2.8395	1.5056	0.022918	1.8764	Glucosylgentiopicroside	up	0	0
M411	0.38914	-1.3617	0.02374	1.868	Kaempferol	down	Flavonoids	Flavonoid biosynthesis;Flavone and flavonol biosynthesis;Biosynthesis of phenylpropanoids;Metabolic pathways;Biosynthesis of secondary metabolites
M141	4.589	2.1982	0.024064	1.8648	2'-Deoxycytidine	up	Pyrimidine nucleosides	Pyrimidine metabolism;Metabolic pathways;ABC transporters
M804	0.66028	-0.59884	0.024383	1.8616	Mukonal	down	Indoles and derivatives	-
M538	0.57968	-0.78668	0.024813	1.8574	N-Acetylcystathionine	down	Carboxylic acids and derivatives	-
M883	0.33751	-1.567	0.025072	1.8549	3-Nitrotyrosine	down	Carboxylic acids and derivatives	-
M15	19.662	4.2973	0.02584	1.8476	Dimethylglycine	up	Carboxylic acids and derivatives	Glycine, serine and threonine metabolism;Metabolic pathways
M1260	0.57562	-0.79681	0.02601	1.846	Cystathionine ketimine	down	Carboxylic acids and derivatives	-
M1014	1.8418	0.88115	0.026526	1.8411	MG(24:6(6Z,9Z,12Z,15Z,18Z,21Z)/0:0/0:0)	up	Glycerolipids	-
M1158	0.62071	-0.68801	0.026762	1.8389	Ajmaline	down	Ajmaline-sarpagine alkaloids	Indole alkaloid biosynthesis;Biosynthesis of secondary metabolites
M757	0.66489	-0.58882	0.027633	1.831	10-Acetoxyoleuropein	down	Prenol lipids	-
M630	2.2759	1.1864	0.028153	1.8263	26-(2-Glucosyl-6-acetylglucosyl]-1,3,11,22-tetrahydroxyergosta-5,24-dien-26-oate	up	Fatty Acyls	-
M614	0.051728	-4.2729	0.028576	1.8226	4'-Hydroxyflurbiprofen	down	Benzene and substituted derivatives	-
M263	10.982	3.4571	0.029849	1.8116	Deoxycytidine	up	Pyrimidine nucleosides	Pyrimidine metabolism;Metabolic pathways;ABC transporters
M143	0.39055	-1.3564	0.029961	1.8106	Perseitol	down	Organooxygen compounds	-
M741	2.0964	1.0679	0.03014	1.8091	Falcarindiol	up	Fatty Acyls	-
M175	2.9528	1.5621	0.03074	1.804	2'-Deoxyguanosine	up	Purine nucleosides	Purine metabolism;Metabolic pathways;ABC transporters
M207	0.16579	-2.5926	0.031344	1.799	(16alpha,17beta)-estra-1,3,5(10)-triene-3,16,17-triol	down	Steroids and steroid derivatives	Steroid hormone biosynthesis;Metabolic pathways;Progesterone, androgen and estrogen receptor agonists/antagonists
M1242	7.7192	2.9485	0.031802	1.7953	Zeranol	up	Macrolides and analogues	-
M392	0.5472	-0.86985	0.033146	1.7845	Equol	down	Isoflavonoids	-
M606	0.38722	-1.3688	0.033376	1.7827	Americine	down	Carboxylic acids and derivatives	-
M926	8.5758	3.1003	0.033528	1.7815	Benzoylcarnitine	up	Benzene and substituted derivatives	-
M933	0.2798	-1.8375	0.034687	1.7725	Protobassic acid	down	Prenol lipids	-
M467	3.8885	1.9592	0.034971	1.7703	Harmalol	up	Harmala alkaloids	-
M304	0.64542	-0.6317	0.035898	1.7633	Secoisolariciresinol Diglucoside	down	Lignan glycosides	-
M985	2.106	1.0745	0.036459	1.7592	(2E,4E,6Z)-2,4,6-Decatrienoic acid dehydropiperidide	up	Pyridines and derivatives	-
M742	2.1582	1.1098	0.036505	1.7588	2-[(7-hydroxy-1-oxo-1H-isochromen-3-yl)formamido]acetic acid	up	Carboxylic acids and derivatives	-
M18	4.2126	2.0747	0.037102	1.7545	Styrene	up	Benzene and substituted derivatives	-
M319	18.041	4.1732	0.037412	1.7522	DL-3-Aminoisobutyric acid	up	Carboxylic acids and derivatives	-
M398	6.8656	2.7794	0.037912	1.7486	Zeatin	up	Imidazopyrimidines	Zeatin biosynthesis;Biosynthesis of plant secondary metabolites;Biosynthesis of plant hormones;Metabolic pathways;Biosynthesis of secondary metabolites;Plant hormone signal transduction
M445	2.0328	1.0235	0.038046	1.7476	Ginkgolide C	up	Prenol lipids	-
M1058	2.5072	1.3261	0.038268	1.746	(R)-Laudanidine	up	Isoquinolines and derivatives	Isoquinoline alkaloid biosynthesis;Biosynthesis of secondary metabolites
M516	0.59304	-0.7538	0.038841	1.742	4-Hydroxyatomoxetine	down	Phenols	-
M932	0.45131	-1.1478	0.039461	1.7376	Pitheduloside I	down	Prenol lipids	-
M1078	7.9326	2.9878	0.041401	1.7243	11-Dehydrocorticosterone	up	Steroids and steroid derivatives	Steroid hormone biosynthesis
M806	1.6977	0.76358	0.042595	1.7163	Mizoribine	up	Imidazole ribonucleosides and ribonucleotides	-
M1393	2.2635	1.1785	0.043654	1.7094	FA 18:1+1O	up	0	0
M533	2.193	1.1329	0.043762	1.7087	Alanylleucine	up	Carboxylic acids and derivatives	-
M561	4.5663	2.191	0.043803	1.7084	(R)-3-Hydroxy-Octadecanoic acid	up	Fatty Acyls	-
M182	2.8068	1.4889	0.044459	1.7042	Liquiritigenin	up	Flavonoids	Flavonoid biosynthesis;Isoflavonoid biosynthesis;Biosynthesis of phenylpropanoids;Biosynthesis of secondary metabolites
M854	1.8021	0.84971	0.047051	1.6879	N-Acetyl-L-methionine	up	Carboxylic acids and derivatives	-
M151	0.64677	-0.62867	0.047589	1.6846	KOBUSONE	down	Organooxygen compounds有机氧化合物	-
M950	0.22896	-2.1269	0.048101	1.6814	2-(2,3,5-trihydroxy-4-methoxyphenyl)propanoic acid	down	Prenol lipids	-
M1399	0.62241	-0.68407	0.048475	1.6792	Echinocystic acid-3-O-glucoside	down	0	0
M403	5.3387	2.4165	0.04858	1.6785	Phenylacetylglutamine	up	Carboxylic acids and derivatives羧酸及其衍生物	Phenylalanine metabolism
M1211	0.56221	-0.83081	0.049054	1.6757	Vinaginsenoside R12	down	Phenols酚类	-
M1282	2.8618	1.5169	0.049494	1.6731	LysoPE(0:0/22:6(4Z,7Z,10Z,13Z,16Z,19Z))	up	Glycerophospholipids甘油磷酯	-
M1212	0.46193	-1.1142	0.049579	1.6726	Ginsenoside Rh6	down	Prenol lipids	-
