# Supplementary material for: Integrated analysis of gut microbiome and its metabolites in ACE2-knockout and ACE2-overexpressed mice
Source: Front Cell Infect Microbiol. 2024 Jul 17;14:1404678. doi: 10.3389/fcimb.2024.1404678 (PMC11288824; doi:10.3389/fcimb.2024.1404678)
Supplement: Additional File 2 — Details of the 75 fecal metabolites between the ACE2 and control groups. [file DataSheet_2.xlsx]

## Sheet: Sheet1
ID	FC	log2FC	Pvalue	VIP	Name	Up.Down	Class_IV	KEGG_pathway
Com_16192_pos	4.64802	2.21662	0.000436923	2.11128	1,7-bis(3,4-dihydroxyphenyl)heptan-3-one	up		--
Com_6164_pos	3.1414	1.65141	0.00124444	2.07319	Camptothecin	up	Camptothecins	--
Com_2406_pos	3.39401	1.76299	0.00159867	2.10959	Normorphine	up	Morphinans	map00982 Drug metabolism - cytochrome P450
Com_3716_pos	2.34132	1.22732	0.00206912	2.06296	IRH	up		--
Com_3404_pos	2.98675	1.57858	0.00291054	1.95804	5α-Pregnan-3,20-dione	up	Gluco/mineralocorticoids, progestogins and derivatives	--
Com_3482_pos	2.86577	1.51892	0.0031551	1.95439	Dibutyl sebacate	up	Fatty acid esters	--
Com_14301_pos	2.66852	1.41604	0.00566312	1.88478	N-{4-[(2R,3R)-3-(Hydroxymethyl)-5-oxo-2-morpholinyl]phenyl}acetamide	up	Phenylmorpholines	--
Com_17968_pos	2.26973	1.18252	0.00611745	1.90787	LysoPC 12:1	up	Phosphocholines	--
Com_15601_pos	1.81831	0.862602	0.00613203	1.94266	DL-Panthenol	up	N-acyl amines	--
Com_1528_pos	2.31792	1.21283	0.00644762	1.86027	Guggulsterone	up	Androgens and derivatives	--
Com_2432_pos	1.56841	0.6493	0.00966092	1.81948	Androstenedione	up	Androgens and derivatives	map00140 Steroid hormone biosynthesis;map01100 Metabolic pathways;map01522 Endocrine resistance;map04913 Ovarian steroidogenesis;map04917 Prolactin signaling pathway;map05200 Pathways in cancer;map05215 Prostate cancer
Com_17269_pos	3.784	1.91991	0.0101043	1.80185	Epinastine	up		--
Com_10830_pos	8.38993	3.06866	0.0102234	1.87031	TLK	up		--
Com_16636_pos	2.19998	1.13749	0.0107344	1.79135	YPH	up		--
Com_5672_pos	1.98181	0.986817	0.0126239	1.78581	L-Homocitrulline	up	L-alpha-amino acids	--
Com_3733_pos	0.562481	-0.830124	0.0138124	1.82207	N3,N4-Dimethyl-L-arginine	down	Arginine and derivatives	--
Com_5546_pos	3.68486	1.88161	0.0153237	1.80258	LPK	up		--
Com_844_pos	1.5676	0.648561	0.0155237	1.78924	UR-144 N-(2-hydroxypentyl) metabolite	up	N-alkylindoles	--
Com_1984_pos	1.5702	0.650948	0.0155311	1.74127	D-Serine	up	Serine and derivatives	map00260 Glycine, serine and threonine metabolism;map01100 Metabolic pathways;map04742 Taste transduction
Com_3849_pos	2.30417	1.20425	0.0159527	1.72983	6-methyl-4-(morpholinomethyl)-2H-chromen-2-one	up		--
Com_7359_pos	0.708861	-0.496426	0.0163245	1.74299	4-Methyl-2-Oxopentanoic Acid	down		--
Com_5776_pos	4.97634	2.31508	0.0165053	1.74202	ELK	up		--
Com_2267_pos	2.06871	1.04873	0.0173917	1.72441	(6E)-7-(2H-1,3-benzodioxol-5-yl)-1-(piperidin-1-yl)hept-6-en-1-one	up		--
Com_8441_pos	1.68353	0.751487	0.0186855	1.69852	Gly-Tyr-Ala	up	Oligopeptides	--
Com_3750_pos	9.82739	3.29681	0.0192522	1.7412	Stanozolol	up	Estrane steroids	--
Com_389_pos	1.57451	0.654901	0.0192906	1.69491	Pipecolic acid	up	Alpha amino acids	map00310 Lysine degradation;map01100 Metabolic pathways
Com_390_pos	1.57451	0.654901	0.0192906	1.69491	DL-Lysine	up	Alpha amino acids	--
Com_2077_pos	0.578656	-0.789223	0.0194225	1.68821	5-(6-hydroxy-6-methyloctyl)-2,5-dihydrofuran-2-one	down		--
Com_5198_pos	1.232	0.301006	0.0195438	1.72184	Phenylpyruvic acid	up	Phenylpyruvic acid derivatives	map00360 Phenylalanine metabolism;map00400 Phenylalanine, tyrosine and tryptophan biosynthesis;map01100 Metabolic pathways;map01210 2-Oxocarboxylic acid metabolism;map01230 Biosynthesis of amino acids
Com_5127_pos	1.75211	0.80909	0.0196578	1.77414	16,16-Dimethyl prostaglandin A2	up	Prostaglandins and related compounds	--
Com_485_pos	1.68829	0.75556	0.0202954	1.73616	Threonine	up	D-alpha-amino acids	--
Com_17523_pos	0.722165	-0.4696	0.0209144	1.6963	D-Erythrose 4-phosphate	down		map00030 Pentose phosphate pathway;map00400 Phenylalanine, tyrosine and tryptophan biosynthesis;map00750 Vitamin B6 metabolism;map01100 Metabolic pathways;map01200 Carbon metabolism;map01230 Biosynthesis of amino acids
Com_1243_pos	1.60852	0.685732	0.0211558	1.71396	16,16-Dimethyl prostaglandin A1	up	Prostaglandins and related compounds	--
Com_2169_pos	2.18713	1.12904	0.021156	1.7092	Asparagine	up	Asparagine and derivatives	--
Com_5567_pos	0.70183	-0.510807	0.0214785	1.68672	2-(4,4-diphenyl-1-piperidinobuta-1,3-dienyl)phenyl acetate	down		--
Com_19856_pos	0.649904	-0.621701	0.0215241	1.67006	(11E,15Z)-9,10,13-trihydroxyoctadeca-11,15-dienoic acid	down		--
Com_16743_pos	0.247165	-2.01645	0.0217244	1.89431	Arachidonoyl serinol	down	N-acyl amines	--
Com_2532_pos	0.672249	-0.572932	0.0218557	1.74748	(+/-)11(12)-DiHET	down	Hydroxyeicosatrienoic acids	--
Com_17781_pos	3.27314	1.71068	0.0218884	1.80346	AMK	up		--
Com_3218_pos	2.46681	1.30264	0.0221313	1.80097	2,6-Di-tert-butyl-1,4-benzoquinone	up	Monocyclic monoterpenoids	--
Com_7891_pos	0.520725	-0.941408	0.0226278	1.67836	WPH	down		--
Com_6248_pos	0.423944	-1.23806	0.022931	1.75921	N-Methylhydantoin	down	Imidazolines	map00330 Arginine and proline metabolism;map01100 Metabolic pathways
Com_6249_pos	0.426177	-1.23047	0.0231899	1.75659	L-Asparagine	down	Asparagine and derivatives	map00250 Alanine, aspartate and glutamate metabolism;map00970 Aminoacyl-tRNA biosynthesis;map01100 Metabolic pathways;map01230 Biosynthesis of amino acids;map04974 Protein digestion and absorption;map04978 Mineral absorption;map05230 Central carbon metabolism in cancer
Com_10220_pos	2.18853	1.12996	0.0244938	1.67448	Homovanillic acid	up	Methoxyphenols	map00350 Tyrosine metabolism;map01100 Metabolic pathways;map04728 Dopaminergic synapse
Com_1869_pos	5.87756	2.55522	0.0251117	1.65669	Taurocholic acid	up	Trihydroxy bile acids, alcohols and derivatives	map00120 Primary bile acid biosynthesis;map00430 Taurine and hypotaurine metabolism;map01100 Metabolic pathways;map04976 Bile secretion;map04979 Cholesterol metabolism
Com_10718_pos	2.46547	1.30186	0.0269449	1.62465	QLK	up		--
Com_7190_pos	2.4051	1.26609	0.0281659	1.68496	7-Methylxanthine	up	Xanthines	map00232 Caffeine metabolism;map01100 Metabolic pathways
Com_18845_pos	0.700101	-0.514365	0.0285323	1.68259	N-Oleoyl Glycine	down	N-acyl-alpha amino acids	--
Com_6317_pos	0.793099	-0.334428	0.0286239	1.65937	DNK	down		--
Com_5692_pos	1.97723	0.983484	0.0309372	1.66466	GLK	up		--
Com_9156_pos	2.93273	1.55224	0.032506	1.72922	2-[(3S)-1-(3,4-Difluorobenzyl)-3-pyrrolidinyl]-1H-benzimidazole	up	Benzimidazoles	--
Com_4861_pos	3.14813	1.65449	0.033533	1.63183	VPH	up		--
Com_843_pos	0.748687	-0.417565	0.0352186	1.58553	9-Oxo-ODE	down	Lineolic acids and derivatives	--
Com_724_pos	1.67454	0.743765	0.0359487	1.56378	3,4-MDEA-d5	up		--
Com_13748_pos	0.750436	-0.414199	0.0363388	1.57986	Diacetoxyscirpenol	down	Trichothecenes	--
Com_1005_pos	1.35647	0.439855	0.0380662	1.63871	Pregnenolone	up	Gluco/mineralocorticoids, progestogins and derivatives	map00140 Steroid hormone biosynthesis;map01100 Metabolic pathways;map04913 Ovarian steroidogenesis;map04925 Aldosterone synthesis and secretion;map04927 Cortisol synthesis and secretion;map04934 Cushing's syndrome
Com_820_pos	0.646032	-0.630322	0.0386614	1.56385	2'-Deoxyadenosine	down	Purine 2'-deoxyribonucleosides	map00230 Purine metabolism;map01100 Metabolic pathways
Com_6312_pos	0.79417	-0.33248	0.039307	1.54701	6,9-dimethoxy-11H-indeno[1,2-b]quinoxalin-11-one	down		--
Com_18600_pos	2.17234	1.11925	0.0394288	1.57963	(1E,4E)-1,5-bis(4-methoxyphenyl)penta-1,4-dien-3-one	up		--
Com_137_pos	0.740692	-0.433054	0.039902	1.53931	cyclohexyl{4-[4-nitro-2-(1H-pyrrol-1-yl)phenyl]piperazino}methanone	down		--
Com_5208_pos	1.90566	0.930288	0.0420598	1.56567	SLH	up		--
Com_9669_pos	2.00959	1.0069	0.0423335	1.55933	VNK	up		--
Com_2202_pos	0.680413	-0.555518	0.0426811	1.60537	RMK	down		--
Com_18764_pos	1.4677	0.553554	0.0428269	1.55666	3-N-Methyl-L-histidine	up	Histidine and derivatives	--
Com_26078_pos	0.223503	-2.16163	0.0431899	1.52366	Nonanoic acid	down	Medium-chain fatty acids	--
Com_14054_pos	1.45859	0.54457	0.0434608	1.52626	QPK	up		--
Com_1550_pos	1.7286	0.789605	0.0437808	1.52491	2-{[methyl(2,3,4,5,6-pentahydroxyhexyl)amino]methylidene}malononitrile	up		--
Com_71_pos	1.47805	0.5637	0.0449488	1.51504	Valine	up	Valine and derivatives	--
Com_46_pos	1.49492	0.580069	0.045461	1.54754	L-Norleucine	up	L-alpha-amino acids	--
Com_1452_pos	1.80904	0.855226	0.045978	1.53316	1H-indene-3-carboxamide	up		--
Com_1453_pos	1.80904	0.855226	0.045978	1.53316	Serotonin	up	Serotonins	map00380 Tryptophan metabolism;map01100 Metabolic pathways;map04024 cAMP signaling pathway;map04080 Neuroactive ligand-receptor interaction;map04540 Gap junction;map04721 Synaptic vesicle cycle;map04726 Serotonergic synapse;map04742 Taste transduction;map04750 Inflammatory mediator regulation of TRP channels;map04976 Bile secretion
Com_5259_pos	0.777484	-0.363114	0.0472142	1.67434	5-fluoro AB-PINACA N-(4-hydroxypentyl) metabolite	down	N-acyl-alpha amino acids and derivatives	--
Com_2769_pos	1.85087	0.888203	0.0477938	1.5427	nor-6β-Oxycodol	up	Phenanthrenes and derivatives	--
Com_38_pos	1.48353	0.569033	0.0480138	1.53396	L-Phenylalanine	up	Phenylalanine and derivatives	map00360 Phenylalanine metabolism;map00400 Phenylalanine, tyrosine and tryptophan biosynthesis;map00970 Aminoacyl-tRNA biosynthesis;map01100 Metabolic pathways;map01210 2-Oxocarboxylic acid metabolism;map01230 Biosynthesis of amino acids;map02010 ABC transporters;map04974 Protein digestion and absorption;map04978 Mineral absorption
Com_10958_pos	0.668698	-0.580573	0.0486953	1.51935	All-Trans-13,14-Dihydroretinol	down		map00830 Retinol metabolism
